# Supplementary material
Source: PubMed Central journal article supplement (PMC6035043)
Supplement: NIHMS978776-supplement-supplement_1.pdf [file NIHMS978776-supplement-supplement_1.pdf]

Supplementary Tables and Figures:

1a

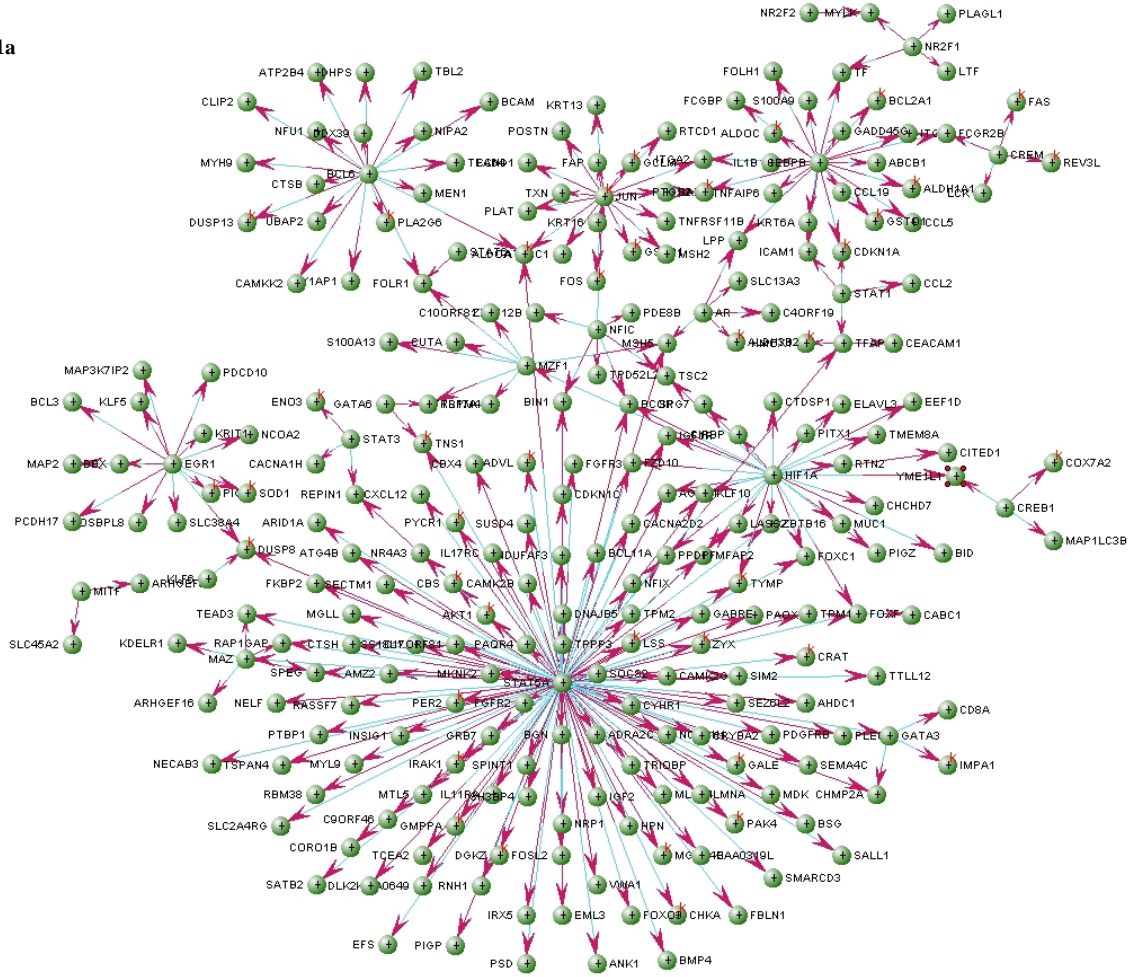

1b

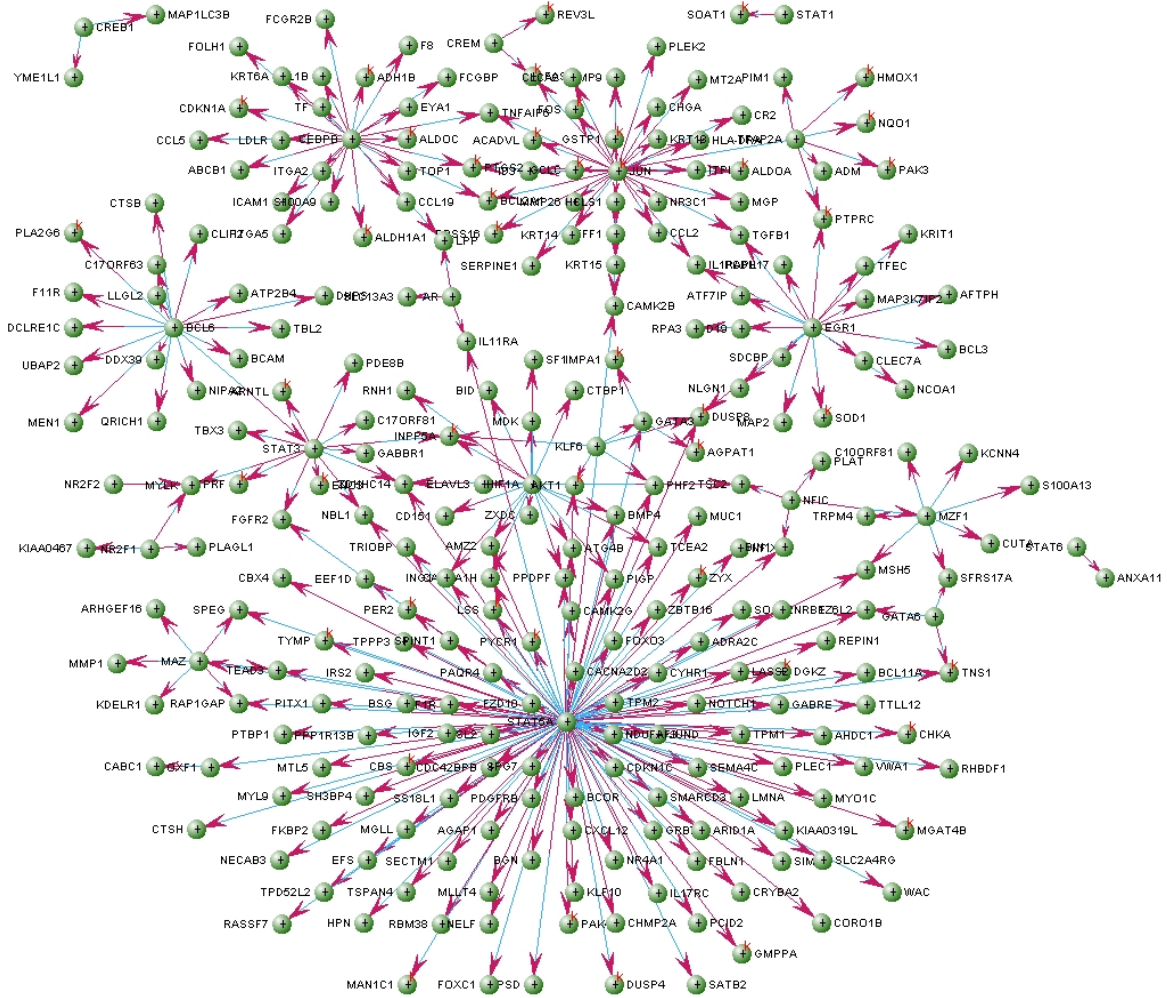

**Supplementary Figure 1. Prostate cancer network in (a) African Americans (b) European Americans.** The network was built using microarray data for high grade prostate samples overlaid with transcription factor data in VisANT. The hubs in the networks are STAT5a, JUN, HIF-1a, CEBPB, BCL-6 and NFIC.

2a

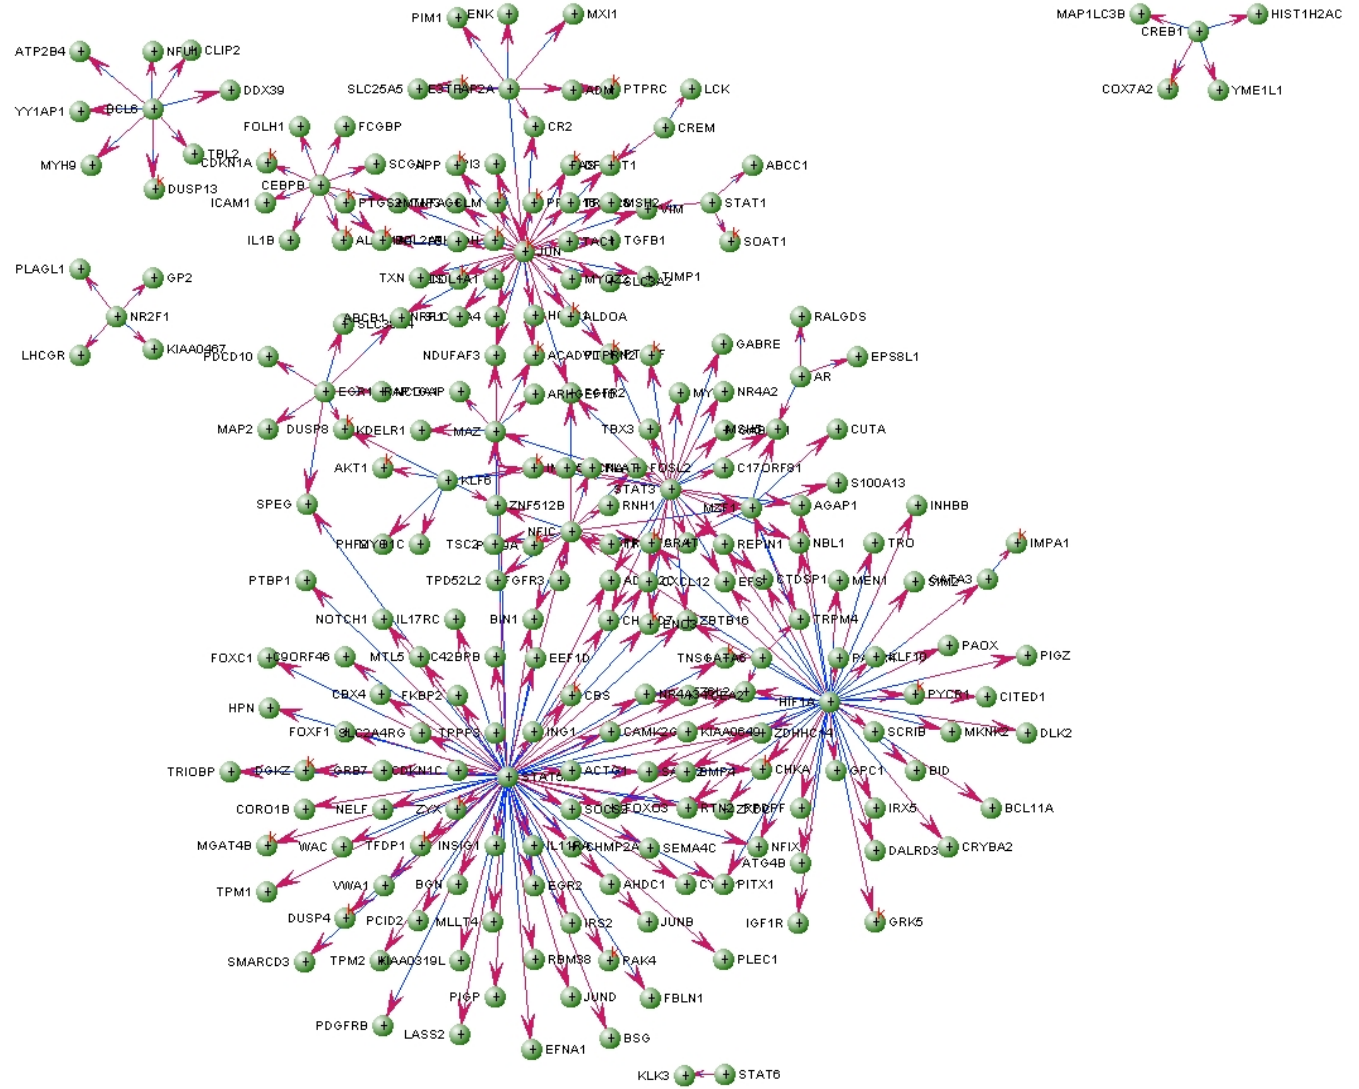

2b

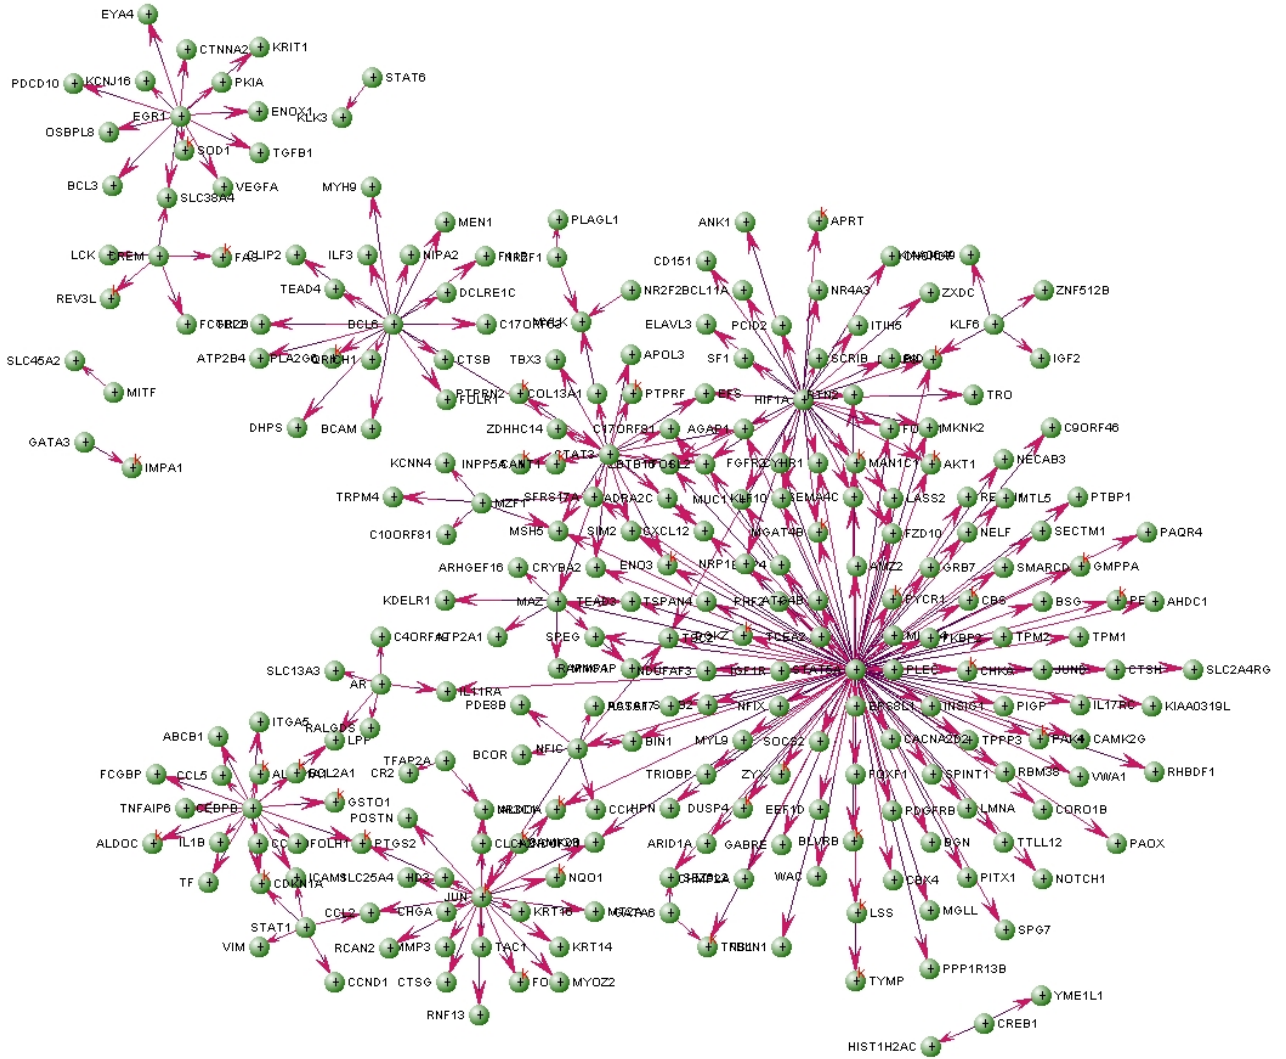

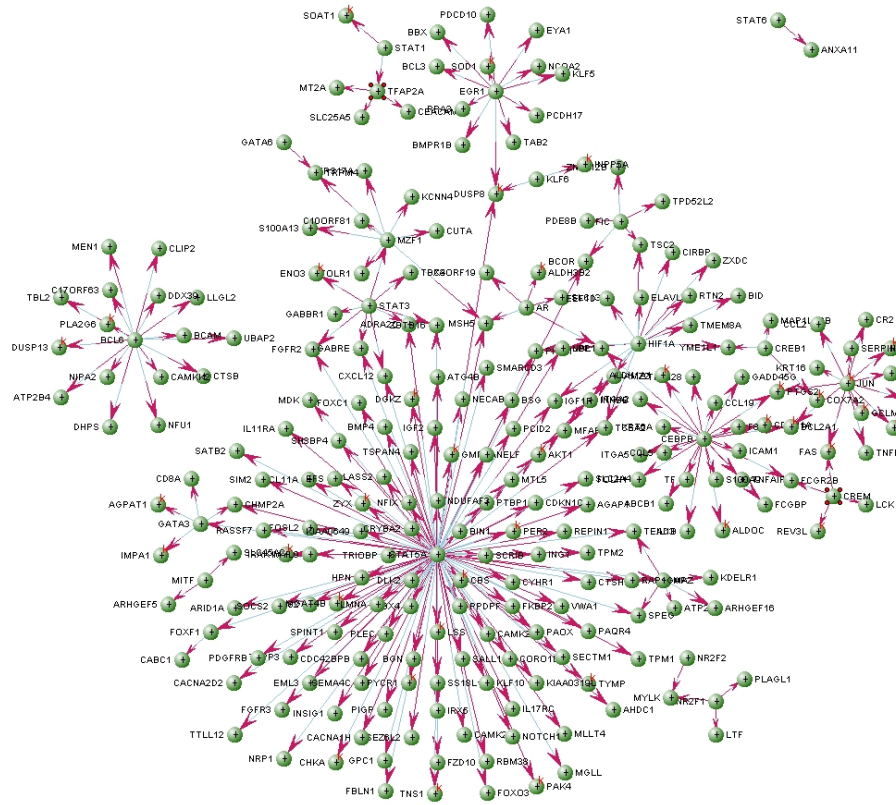

**Supplementary Figure 2. Principal networks hubs for (a) normal prostate, (b) low Gleason grade (<7) prostate cancer (c) high Gleason grade ( $\geq 7$ ) prostate cancer. The central nodes (genes) in these hubs are STAT5a, HIF-1a, STAT3, JUN, CEBPB and EGR1.**



**Table 1. Differential expression of hubs identified in regulatory networks.** Significance level of hubs associated with low and high grade tumors using single-gene analysis only. Student's t-test p-values for differentiating pair-wise between normal prostate, low grade tumor and high grade tumor are shown with those significant at p-value <0.05 shown in red (these hubs can be identified by single link analysis using the t-test). However, the rest of the hubs (those with poor p-values) can only be identified by the co-regulation analysis we present here. They are not identifiable using single gene analysis.

| Gene Name                                                       | Type of hub | Normal vs. Low grade tumors | Normal vs. High grade tumors | Low vs. High grade tumors | Pathway (KEGG, BIOCARTA database)                                                                                                                                                                                                                                                                                                                                                                                                                                                                                                                                                                                                                                                                                                                                                                                                                                                                                                                                                                                                                                                                                                                                                                                                                                                                    |
|-----------------------------------------------------------------|-------------|-----------------------------|------------------------------|---------------------------|------------------------------------------------------------------------------------------------------------------------------------------------------------------------------------------------------------------------------------------------------------------------------------------------------------------------------------------------------------------------------------------------------------------------------------------------------------------------------------------------------------------------------------------------------------------------------------------------------------------------------------------------------------------------------------------------------------------------------------------------------------------------------------------------------------------------------------------------------------------------------------------------------------------------------------------------------------------------------------------------------------------------------------------------------------------------------------------------------------------------------------------------------------------------------------------------------------------------------------------------------------------------------------------------------|
|                                                                 |             | t-test p-value              |                              |                           |                                                                                                                                                                                                                                                                                                                                                                                                                                                                                                                                                                                                                                                                                                                                                                                                                                                                                                                                                                                                                                                                                                                                                                                                                                                                                                      |
| STAT5a<br>signal transducer and activator of transcription 5A   | Gain        | <b>0.036</b>                | <b>0.016</b>                 | 0.819                     | ErbB signaling pathway, Jak-STAT signaling pathway, Bioactive Peptide Induced Signaling Pathway, EGF Signaling Pathway, EPO Signaling Pathway, Growth Hormone Signaling Pathway, IL-10 Anti-inflammatory Signaling Pathway, IL22 Soluble Receptor Signaling Pathway, IL 2 signaling pathway, IL-2 Receptor Beta Chain in T cell Activation, IL 3 signaling pathway, IL-7 Signal Transduction, PDGF Signaling Pathway                                                                                                                                                                                                                                                                                                                                                                                                                                                                                                                                                                                                                                                                                                                                                                                                                                                                                 |
| CEBPB<br>CCAAT/enhancer binding protein (C/EBP), beta           | Gain        | 0.570                       | <b>0.041</b>                 | 0.237                     | IL 6 signaling pathway                                                                                                                                                                                                                                                                                                                                                                                                                                                                                                                                                                                                                                                                                                                                                                                                                                                                                                                                                                                                                                                                                                                                                                                                                                                                               |
| EGR1<br>early growth response 1                                 | Gain        | 0.601                       | 0.362                        | 0.142                     | Phosphorylation of MEK1 by cdk5/p35 down regulates the MAP kinase pathway                                                                                                                                                                                                                                                                                                                                                                                                                                                                                                                                                                                                                                                                                                                                                                                                                                                                                                                                                                                                                                                                                                                                                                                                                            |
| NFIC<br>nuclear factor I/C (CCAAT-binding transcription factor) |             | 0.897                       | 0.820                        | 0.776                     |                                                                                                                                                                                                                                                                                                                                                                                                                                                                                                                                                                                                                                                                                                                                                                                                                                                                                                                                                                                                                                                                                                                                                                                                                                                                                                      |
| STAT3<br>signal transducer and activator of transcription 3     |             | <b>0.001</b>                | <b>0.005</b>                 | <b>0.002</b>              | Chemokine signaling pathway, Jak-STAT signaling pathway, Adipocytokine signaling pathway, EGF Signaling Pathway, Erk1/Erk2 Mapk Signaling pathway, Role of ERBB2 in Signal Transduction and Oncology, IL22 Soluble Receptor Signaling Pathway, IL 6 signaling pathway, Signaling of Hepatocyte Growth Factor Receptor, PDGF Signaling Pathway, Stat3 Signaling Pathway, TPO Signaling Pathway                                                                                                                                                                                                                                                                                                                                                                                                                                                                                                                                                                                                                                                                                                                                                                                                                                                                                                        |
| JUN<br>jun oncogene                                             |             | 0.173                       | 0.070                        | 0.707                     | MAPK signaling pathway, ErbB signaling pathway, Wnt signaling pathway, Focal adhesion, Toll-like receptor signaling pathway, T cell receptor signaling pathway, B cell receptor signaling pathway, Neurotrophin signaling pathway, GnRH signaling pathway, Epithelial cell signaling in Helicobacter pylori infection, The 4-1BB-dependent immune response, Agrin in Postsynaptic Differentiation, Oxidative Stress Induced Gene Expression Via Nrf2, Angiotensin II mediated activation of JNK Pathway via Pyk2 dependent signaling, ATM Signaling Pathway, BCR Signaling Pathway, Pertussis toxin-insensitive CCR5 Signaling in Macrophage, Cadmium induces DNA synthesis and proliferation in macrophages, D4-GDI Signaling Pathway, EGF Signaling Pathway, EPO Signaling Pathway, METS affect on Macrophage Differentiation, FAS signaling pathway ( CD95 ), Fc Epsilon Receptor 1 Signaling in Mast Cells, Signaling Pathway from G-Protein Families, Hypoxia-Inducible Factor in the Cardiovascular System, IGF-1 Signaling Pathway, IL12 and Stat4 Dependent Signaling Pathway in Th1 Development, Signal transduction through IL1R, IL 2 signaling pathway, IL 6 signaling pathway, Insulin Signaling Pathway, Integrin Signaling Pathway, Keratinocyte Differentiation, Nerve growth factor |

|                                                  |      |              |       |       |                                                                                                                                                                                                                                                                                                                                           |
|--------------------------------------------------|------|--------------|-------|-------|-------------------------------------------------------------------------------------------------------------------------------------------------------------------------------------------------------------------------------------------------------------------------------------------------------------------------------------------|
|                                                  |      |              |       |       | pathway (NGF),The information-processing pathway at the IFN-beta enhancer, PDGF Signaling Pathway, Proliferators via PPARa(alpha), TNF/Stress Related Signaling, T Cell Receptor Signaling Pathway, TNFR1 Signaling Pathway, Toll-Like Receptor Pathway, TPO Signaling Pathway, TSP-1 Induced Apoptosis in Microvascular Endothelial Cell |
| HIF-1a hypoxia inducible factor 1, alpha subunit | Loss | <b>0.026</b> | 0.050 | 0.464 | mTOR signaling pathway, VEGF, Hypoxia, and Angiogenesis, Erythropoietin mediated neuroprotection through NF-kB, Hypoxia-Inducible Factor in the Cardiovascular System, Hypoxia and p53 in the Cardiovascular system                                                                                                                       |

**Table 2. . Gene connections gained by STAT5a from (a) normal prostate to low grade tumor and (b) in low grade to high grade progression.** The p-values shown are from using single gene analysis and the Student's t-test, with significant p-values (< 0.05) marked in red. Note again that single gene analysis is unable to identify all these associations (some of the p-values are not good). However, the co-regulation analysis and transcription factor filter used in our method readily identified all these links.

**Table 2a**

| Gene name                                                               | Normal vs. low grade tumor | Normal vs. high grade tumor | Low vs. high grade tumor | Pathway (KEGG, BIOCARTA database)                                                                                                                                                                                                                                                                                                                                              |
|-------------------------------------------------------------------------|----------------------------|-----------------------------|--------------------------|--------------------------------------------------------------------------------------------------------------------------------------------------------------------------------------------------------------------------------------------------------------------------------------------------------------------------------------------------------------------------------|
|                                                                         | Student's t-test p-value   |                             |                          |                                                                                                                                                                                                                                                                                                                                                                                |
| AKT1<br>v-akt murine thymoma viral oncogene homolog 1                   | <b>0.001</b>               | <b>0.001</b>                | 0.770                    | MAPK signaling pathway, ErbB signaling pathway, mTOR signaling pathway, Apoptosis, VEGF signaling pathway, Focal adhesion, Tight junction, Toll-like receptor signaling pathway, Jak-STAT signaling pathway, T cell receptor signaling pathway, B cell receptor signaling pathway, Fc epsilon RI signaling pathway, Insulin signaling pathway, Adipocytokine signaling pathway |
| RAP1GAP<br>RAP1 GTPase activating protein                               | <b>0.001</b>               | <b>0.000</b>                | 0.251                    |                                                                                                                                                                                                                                                                                                                                                                                |
| APBA2BP<br>N-terminal EF-hand calcium binding protein 3                 | <b>0.001</b>               | <b>0.001</b>                | 0.626                    |                                                                                                                                                                                                                                                                                                                                                                                |
| ARID1A<br>AT rich interactive domain 1A (SWI-like)                      | <b>0.001</b>               | <b>0.001</b>                | <b>0.047</b>             |                                                                                                                                                                                                                                                                                                                                                                                |
| CACNA2D2<br>calcium channel, voltage-dependent, alpha 2/delta subunit 2 | <b>0.002</b>               | <b>0.022</b>                | 0.143                    | MAPK signaling pathway                                                                                                                                                                                                                                                                                                                                                         |
| ATG4B<br>ATG4 autophagy related 4 homolog B (S. cerevisiae)             | <b>0.002</b>               | <b>0.001</b>                | 0.638                    | Regulation of autophagy                                                                                                                                                                                                                                                                                                                                                        |
| SPINT1<br>serine peptidase inhibitor, Kunitz type 1                     | <b>0.002</b>               | <b>0.001</b>                | 0.465                    |                                                                                                                                                                                                                                                                                                                                                                                |
| GMPPA<br>GDP-mannose pyrophosphorylase A                                | <b>0.003</b>               | <b>0.009</b>                | 0.169                    | Fructose and mannose metabolism                                                                                                                                                                                                                                                                                                                                                |
| CAMK2B<br>calcium/calmodulin-                                           | <b>0.003</b>               | <b>0.000</b>                | 0.999                    | ErbB signaling pathway, Calcium signaling pathway, Wnt signaling                                                                                                                                                                                                                                                                                                               |

|                                                                                          |              |              |              |                                                                                                        |
|------------------------------------------------------------------------------------------|--------------|--------------|--------------|--------------------------------------------------------------------------------------------------------|
| dependent protein kinase II beta                                                         |              |              |              | pathway, Long-term potentiation, Olfactory transduction, GnRH signaling pathway, Melanogenesis         |
| AMZ2<br>archaelysin family metalloproteinase 2                                           | <b>0.003</b> | <b>0.002</b> | 0.516        |                                                                                                        |
| TTL12<br>tubulin tyrosine ligase-like family, member 12                                  | <b>0.004</b> | <b>0.000</b> | 0.195        |                                                                                                        |
| MSH5<br>mutS homolog 5 (E. coli)                                                         | <b>0.005</b> | <b>0.001</b> | 0.169        |                                                                                                        |
| FGFR2<br>fibroblast growth factor receptor 2                                             | <b>0.008</b> | 0.114        | 0.161        | MAPK signaling pathway, Regulation of actin cytoskeleton                                               |
| REPIN1<br>replication initiator 1                                                        | <b>0.013</b> | <b>0.002</b> | <b>0.047</b> |                                                                                                        |
| LSS<br>lanosterol synthase (2,3-oxidosqualene-lanosterol cyclase)                        | <b>0.014</b> | 0.159        | <b>0.023</b> | Biosynthesis of steroids                                                                               |
| TSPAN4<br>tetraspanin 4                                                                  | <b>0.016</b> | <b>0.038</b> | 0.266        |                                                                                                        |
| KLF10<br>Kruppel-like factor 10                                                          | <b>0.020</b> | <b>0.011</b> | 0.371        |                                                                                                        |
| PYCR1<br>sirtuin (silent mating type information regulation 2 homolog) 7 (S. cerevisiae) | <b>0.023</b> | <b>0.005</b> | 0.586        | Arginine and proline metabolism,                                                                       |
| CTSH<br>cathepsin H                                                                      | <b>0.039</b> | <b>0.007</b> | 0.526        |                                                                                                        |
| MGLL<br>monoglyceride lipase                                                             | 0.050        | 0.208        | 0.112        | Glycerolipid metabolism,                                                                               |
| CENTG2<br>ArfGAP with GTPase domain, ankyrin repeat and PH domain 1                      | 0.051        | <b>0.007</b> | 0.175        |                                                                                                        |
| TEAD3<br>TEA domain family member 3                                                      | 0.052        | 0.135        | 0.148        |                                                                                                        |
| IGF1R<br>insulin-like growth factor 1 receptor                                           | 0.053        | 0.050        | 0.823        | Focal adhesion, Adherens junction, Long-term depression                                                |
| MYL9<br>myosin, light chain 9, regulatory                                                | 0.065        | 0.542        | 0.075        | Focal adhesion, Tight junction, Leukocyte transendothelial migration, Regulation of actin cytoskeleton |
| GABRE<br>gamma-aminobutyric acid (GABA) A receptor, epsilon                              | 0.073        | 0.061        | 0.918        | Neuroactive ligand-receptor interaction                                                                |
| SIM2<br>single-minded homolog 2 (Drosophila)                                             | 0.083        | <b>0.001</b> | 0.186        |                                                                                                        |
| NRP1<br>neuropilin 1                                                                     | 0.096        | 0.189        | 0.656        | Axon guidance                                                                                          |
| PAQR4<br>progesterone and adipoQ receptor                                                | 0.211        | 0.944        | 0.052        |                                                                                                        |



|                                                                                       |       |              |       |                                            |
|---------------------------------------------------------------------------------------|-------|--------------|-------|--------------------------------------------|
| family member IV                                                                      |       |              |       |                                            |
| PER2<br>period homolog 2<br>(Drosophila)                                              | 0.250 | 0.532        | 0.525 | Circadian rhythm – mammal                  |
| ECGF1<br>sphingosine-1-<br>phosphate receptor<br>1                                    | 0.272 | 0.086        | 0.710 | Neuroactive ligand-receptor<br>interaction |
| FZD10<br>frizzled homolog 10<br>(Drosophila)                                          | 0.310 | <b>0.049</b> | 0.404 | Wnt signaling pathway,<br>Melanogenesis    |
| LMNA<br>lamin A/C                                                                     | 0.406 | 0.085        | 0.427 |                                            |
| PAOX polyamine<br>oxidase (exo-N4-<br>amino)                                          | 0.422 | 0.470        | 0.858 |                                            |
| RASSF7<br>Ras association<br>(RalGDS/AF-6)<br>domain family (N-<br>terminal) member 7 | 0.439 | <b>0.031</b> | 0.065 |                                            |
| SECTM1 secreted<br>and transmembrane<br>1                                             | 0.513 | <b>0.030</b> | 0.068 |                                            |
| DUSP8<br>dual specificity<br>phosphatase 8                                            | 0.666 | 0.542        | 0.966 | MAPK signaling pathway                     |
| FOSL2<br>FOS-like antigen 2                                                           | 0.776 | 0.809        | 0.605 |                                            |
| CRYBA2<br>crystallin, beta A2                                                         | 0.787 | 0.934        | 0.663 |                                            |

**Table 2b**

| Gene name                                                                       | Normal vs.<br>low grade<br>tumor | Normal vs.<br>high grade<br>tumor | Low vs.<br>high grade<br>tumor | Pathways (KEGG & BIOCARTA<br>database)              |
|---------------------------------------------------------------------------------|----------------------------------|-----------------------------------|--------------------------------|-----------------------------------------------------|
|                                                                                 | Student's t-test p-value         |                                   |                                |                                                     |
| EFS<br>embryonal Fyn-<br>associated substrate                                   | <b>0.009</b>                     | 0.147                             | <b>0.000</b>                   |                                                     |
| NBL1<br>neuroblastoma,<br>suppression of<br>tumorigenicity 1                    | <b>0.026</b>                     | 0.179                             | <b>0.000</b>                   |                                                     |
| GPC1<br>glypican 1                                                              | <b>0.028</b>                     | 0.868                             | <b>0.003</b>                   |                                                     |
| SCRIB scribbled<br>homolog<br>(Drosophila)                                      | <b>0.035</b>                     | <b>0.007</b>                      | <b>0.005</b>                   |                                                     |
| EML3<br>echinoderm<br>microtubule<br>associated protein<br>like 3               | <b>0.001</b>                     | <b>0.000</b>                      | <b>0.025</b>                   |                                                     |
| IRAK1<br>interleukin-1<br>receptor-associated<br>kinase 1                       | 0.392                            | <b>0.049</b>                      | 0.100                          | Apoptosis, Toll-like receptor<br>signaling pathway, |
| SS18L1<br>synovial sarcoma<br>translocation gene<br>on chromosome 18-<br>like 1 | <b>0.010</b>                     | <b>0.003</b>                      | 0.130                          |                                                     |
| DLK2<br>delta-like 2<br>homolog                                                 | 0.840                            | 0.179                             | 0.171                          |                                                     |

|                                                                                                                  |              |              |       |                                                                                                                       |
|------------------------------------------------------------------------------------------------------------------|--------------|--------------|-------|-----------------------------------------------------------------------------------------------------------------------|
| (Drosophila)                                                                                                     |              |              |       |                                                                                                                       |
| BCOR<br>BCL6 co-repressor                                                                                        | 0.089        | <b>0.018</b> | 0.209 |                                                                                                                       |
| C20orf149<br>pancreatic<br>progenitor cell<br>differentiation and<br>proliferation factor<br>homolog (zebrafish) | 0.074        | 0.173        | 0.223 |                                                                                                                       |
| IGF2<br>insulin-like growth<br>factor 2<br>(somatomedin A);<br>insulin; INS-IGF2<br>readthrough<br>transcript    | 0.076        | 0.317        | 0.247 | Regulation of autophagy, mTOR<br>signaling pathway, Regulation of<br>actin cytoskeleton, Insulin signaling<br>pathway |
| CACNA1H<br>calcium channel,<br>voltage-dependent,<br>T type, alpha 1H<br>subunit                                 | <b>0.037</b> | 0.172        | 0.249 | MAPK signaling pathway, Calcium<br>signaling pathway                                                                  |
| IRX5<br>iroquois homeobox<br>5                                                                                   | 0.076        | 0.220        | 0.300 |                                                                                                                       |
| MDK<br>Mesomelic<br>dysplasia,<br>Kantaputra type                                                                | 0.128        | 0.216        | 0.465 |                                                                                                                       |
| SALL1<br>sal-like 1<br>(Drosophila)                                                                              | 0.697        | 0.623        | 0.511 |                                                                                                                       |
| FGFR3<br>fibroblast growth<br>factor receptor 3                                                                  | <b>0.047</b> | 0.103        | 0.548 | MAPK signaling pathway,<br>Regulation of actin cytoskeleton                                                           |
| INHBB<br>inhibin, beta B                                                                                         | 0.938        | 0.588        | 0.585 | Cytokine-cytokine receptor<br>interaction,<br>TGF-beta signaling pathway                                              |
| BCL11A<br>B-cell<br>CLL/lymphoma<br>11A (zinc finger<br>protein)                                                 | 0.791        | 0.618        | 0.796 |                                                                                                                       |
| GATA3<br>GATA binding<br>protein 3                                                                               | 0.617        | 0.468        | 0.801 |                                                                                                                       |
| MFAP2<br>microfibrillar-<br>associated protein 2                                                                 | <b>0.007</b> | <b>0.002</b> | 0.909 |                                                                                                                       |
| SH3BP4<br>SH3-domain<br>binding protein 4                                                                        | 0.167        | 0.165        | 0.989 |                                                                                                                       |
